# Supplementary material for: Timing of Novel Drug 1A-116 to Circadian Rhythms Improves Therapeutic Effects against Glioblastoma
Source: MDPI journal article supplement (doi:10.3390/pharmaceutics13071091), 2021-07-16
Supplement: s1 [file s1]

# Supplementary Materials: Timing of Novel Drug 1A-116 to Circadian Rhythms Improves Therapeutic Effects against Glioblastoma

Laura Lucía Trebucq, Georgina Alexandra Cardama, Pablo Lorenzano Menna, Diego Andrés Golombek, Juan José Chiesa and Luciano Marpegan

Primers for exon 1, 2 and 3 of *p53* gene to detect Pro98Leu mutation, and primers for exon 1, 2, 3 and 4 of *PTN* gene were designed. Oligos for *cyclin dependent kinase inhibitor 2A*, that encodes for many transcriptional variants, including *p14ARF* and *p16* genes, were also designed.

## P53

Alignment: Global DNA alignment against reference molecule  
Parameters: Scoring matrix: Linear (Mismatch 2, OpenGap 4, ExtGap 1)

Reference molecule: mRNA p53var1, Region 1 to 2591  
Number of sequences to align: 3  
Total length of aligned sequences with gaps: 2591 bps  
Settings: Similarity significance value cutoff: >= 60%

### Summary of Percent Matches:

| Ref: | mRNA p53var1 | 1 to | 2591 | ( | 2591 bps) | -- |
|------|--------------|------|------|---|-----------|----|
| 2:   | ex3p53       | 1 to | 253  | ( | 253 bps)  | 9% |
| 3:   | exlp53       | 1 to | 67   | ( | 67 bps)   | 2% |

```

mRNA p53var1      1 gatgggattgggggttttccctcccatgtgctcaagactggcgctaaaagtgttgagctt
ex3p53            -----
exlp53            -----

mRNA p53var1     61 ctcaaaagtctagagccacgctccagggagcaggtagctgctgggctccggggacacttt
ex3p53            -----
exlp53            -----

mRNA p53var1    121 gcgttcgggctgggagcgtgctttccacgacggtgacacgcttccctggattggcagcca
ex3p53            -----
exlp53            -----

mRNA p53var1    181 gactgccttcgggtcactgccatggaggagcgcagtcagatcctagcgtcgagccccc Ex1
ex3p53            -----
exlp53            -----
                    1 atggaggagcgcagtcagatcctagcgtcgagccccc

mRNA p53var1    241 tctgagtcaggaaacattttcagacctatggaaactacttctctgaaaacaacgttctgtc Ex2
ex3p53            -----
exlp53            -----
                    39 tctgagtcaggaaacattttcagacctat

mRNA p53var1    301 ccccttgccgtcccaagcaatggatgatttgatgctgtccccggacgatattgaacaatg Ex3
ex3p53            -----
exlp53            -----
                    1 gatgatttgatgctgtccccggacgatattgaacaatg

mRNA p53var1    361 gttcactgaagacccaggtccagatgaagctcccagaatgccagaggctgctccccccgt Ex3
ex3p53            -----
exlp53            -----
                    39 gttcactgaagacccaggtccagatgaagctcccagaatgccagaggctgctccccccgt

mRNA p53var1    421 ggccccctgcaccagcagctcctacacggggggccccctgcaccagccccctcctggcccc Ex3
ex3p53            -----
exlp53            -----
                    99 ggccccctgcaccagcagctcctacacggggggccccctgcaccagccccctcctggcccc

mRNA p53var1    481 gtcattcttctgtccttccagaaaaacctaccagggcagctacggtttccgtctgggctt Ex3
ex3p53            -----
exlp53            -----
                    159 gtcattcttctgtccttccagaaaaacctaccagggcagctacggtttccgtctgggctt

mRNA p53var1    541 cttgcattctgggacagccaagtctgtgacttgcaactccctgcctcaacaagat Ex3
ex3p53            -----
exlp53            -----
                    219 cttgcattctgggacagccaagtctgtgacttgca

mRNA p53var1    601 gttttgccaaactggccaagacctgcctgtgcagctgtgggttgattccacacccccgcc
ex3p53            -----
exlp53            -----

```

In red, mutated codon 98 CCT-CTT

PTN

Alignment: Global DNA alignment against reference molecule  
Parameters: Scoring matrix: Linear (Mismatch 2, OpenGap 4, ExtGap 1)

Reference molecule: PTN mRNA, Region 297 to 803  
Number of sequences to align: 5  
Total length of aligned sequences with gaps: 507 bps  
Settings: Similarity significance value cutoff: >= 60%

#### Summary of Percent Matches:

| Ref: | PTN mRNA | 297 to | 803 | ( | 507 bps) | --  |
|------|----------|--------|-----|---|----------|-----|
| 2:   | ex1PTN   | 1 to   | 59  | ( | 59 bps)  | 11% |
| 3:   | ex2PTN   | 1 to   | 49  | ( | 49 bps)  | 9%  |
| 4:   | ex3PTN   | 1 to   | 140 | ( | 140 bps) | 27% |
| 5:   | ex4PTN   | 1 to   | 56  | ( | 56 bps)  | 11% |

|          |     |                                                               |     |
|----------|-----|---------------------------------------------------------------|-----|
| PTN mRNA | 297 | atgcaggctcaacagtaccagcagcagcgtcgaaaatttgcagctgccttcttggcattc  | Ex1 |
| ex1PTN   | 1   | -----attc                                                     |     |
| ex2PTN   |     | -----                                                         |     |
| ex3PTN   |     | -----                                                         |     |
| ex4PTN   |     | -----                                                         |     |
| PTN mRNA | 357 | attttcatactggcagctgtggatactgctgaagcaggggaagaaagagaaaccagaaaaa |     |
| ex1PTN   | 5   | attttcatactggcagctgtggatactgctgaagcaggggaagaaagagaaaccag----- |     |
| ex2PTN   | 1   | -----aaaaa                                                    |     |
| ex3PTN   |     | -----                                                         |     |
| ex4PTN   |     | -----                                                         |     |
| PTN mRNA | 417 | aaagtgaagaagtctgactgtggagaatggcagtgagtggtgtgtgtgccaccagtgga   | Ex2 |
| ex1PTN   |     | -----                                                         |     |
| ex2PTN   | 6   | aaagtgaagaagtctgactgtggagaatggcagtgagtggtgtgtg-----           |     |
| ex3PTN   |     | -----                                                         |     |
| ex4PTN   |     | -----                                                         |     |
| PTN mRNA | 477 | gactgtgggctgggcacacgggagggcactcggactggagctgagtgcagcaaacatg    |     |
| ex1PTN   |     | -----                                                         |     |
| ex2PTN   |     | -----                                                         |     |
| ex3PTN   |     | -----                                                         |     |
| ex4PTN   |     | -----                                                         |     |
| PTN mRNA | 537 | aagaccagagatgtaagatcccctgcaactggaagaagcaatttggcgaggagtgcaaa   |     |
| ex1PTN   |     | -----                                                         |     |
| ex2PTN   |     | -----                                                         |     |
| ex3PTN   |     | -----                                                         |     |
| ex4PTN   |     | -----                                                         |     |
| PTN mRNA | 597 | taccagttccaggcctggggagaatgtgacctgaacacagccctgaagaccagaactgga  | Ex3 |
| ex1PTN   |     | -----                                                         |     |
| ex2PTN   |     | -----                                                         |     |
| ex3PTN   | 1   | -----ggcctggggagaatgtgacctgaacacagccctgaagaccagaactgga        |     |
| ex4PTN   |     | -----                                                         |     |
| PTN mRNA | 657 | agtctgaagcgagccctgcacaatgccgaatgccagaagactgtcaccatctccaagccc  |     |
| ex1PTN   |     | -----                                                         |     |
| ex2PTN   |     | -----                                                         |     |
| ex3PTN   | 50  | agtctgaagcgagccctgcacaatgccgaatgccagaagactgtcaccatctccaagccc  |     |
| ex4PTN   |     | -----                                                         |     |
| PTN mRNA | 717 | tgtggcaaaactgaccaagcccaaacctcaagcagaatctaagaagaagaaaaaggaaggc | Ex4 |
| ex1PTN   |     | -----                                                         |     |
| ex2PTN   |     | -----                                                         |     |
| ex3PTN   | 110 | tgtggcaaaactgaccaagcccaaacctcaag-----                         |     |
| ex4PTN   | 1   | -----cagaatctaagaagaagaaaaaggaaggc                            |     |
| PTN mRNA | 777 | aagaaacaggagaagatgctggattaa                                   |     |
| ex1PTN   |     | -----                                                         |     |
| ex2PTN   |     | -----                                                         |     |
| ex3PTN   |     | -----                                                         |     |
| ex4PTN   | 30  | aagaaacaggagaagatgctggattaa                                   |     |

**P14 and p16**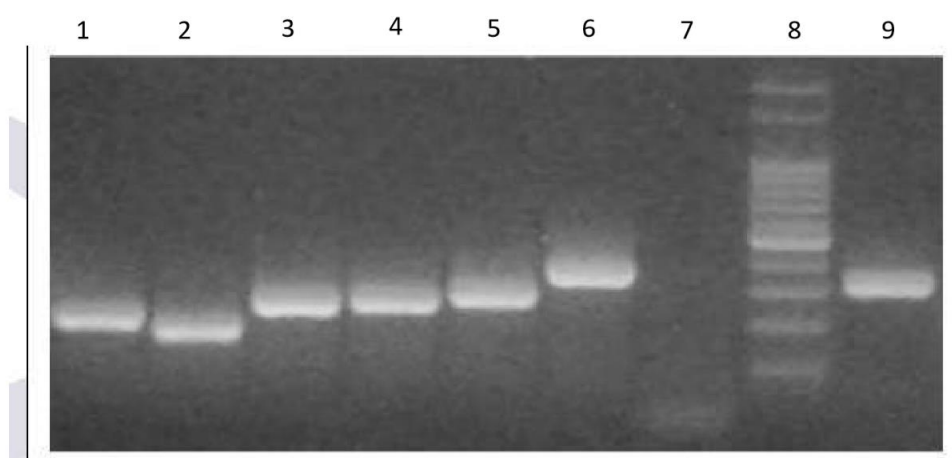

1: Exon 4 PTN 2: Exon 1 PTN 3: Exon 3 PTN 4: Exon 2 PTN 5: Ex1-Ex2 – P53  
 6: Ex3 –P53 **7: p16/p14ARF** 8: Ladder 100 pb 9: Human dystrophin gene fragment (Ctrl +)

Genetic profile of LN229 cell line evaluated by STR.

| <b>Amelogenina</b> | <b>X</b> |
|--------------------|----------|
| <b>D3S1358</b>     | 16, 1/   |
| <b>D1S1656</b>     | 14, 17   |
| <b>D2S441</b>      | 10, 11   |
| <b>D10S1248</b>    | 16       |
| <b>D13S317</b>     | 10, 11   |
| <b>PENTA E</b>     | 7, 16    |
| <b>D16S539</b>     | 12       |
| <b>D18S51</b>      | 13, 15   |
| <b>D2S1338</b>     | 19, 20   |
| <b>CSF1PO</b>      | 12       |
| <b>PENTA D</b>     | 10, 11   |
| <b>TH01</b>        | 9.3      |
| <b>VWA</b>         | 16, 19   |
| <b>D21S11</b>      | 29, 30   |
| <b>D7S820</b>      | 8, 11    |
| <b>D5S818</b>      | 11       |
| <b>TPOX</b>        | 8        |
| <b>D8S1179</b>     | 13, 14   |
| <b>D12S391</b>     | 20, 22   |
| <b>D19S433</b>     | 12, 17.2 |
| <b>SE33</b>        | 29.2     |
| <b>D22S1045</b>    | 15, 16   |
| <b>FGA</b>         | 23       |
| <b>DYS391</b>      | NA       |
| <b>DYS576</b>      | NA       |

Figure S1. LN229 cell line authentication.



Sequence alignment performed with Blast, Query: sequence corresponding to a fragment of exon 2 of *bmal1*, Subject: sequence corresponding to *bmal1* WT. In red: site of Crispr/Cas9 editing. Identity: 254/256 (99%).

Sequence ID: Query\_6344/ Length: 320  
Range 1: 39 to 293

Score:460 bits(249), Expect:1e-134,  
Identities:254/256(99%), Gaps:2/256(0%), Strand: Plus/Plus

```

Query 5   ACAGTT-CATGGGTACTGAGAGGAGGGGTGCCTGGCCTGCCTGGAACACTGGGGAGGCT 63
          ||||| ||||||||||||||||||||||||||||||||||||||||||||
Sbjct 39   ACAGTTCATGGGTACTGAGAGGAGGGGTGCCTGGCCTGCCTGGAACACTGGGGAGGCT 98
|
Query 64   TACAGGGAAAACTGTCCAATGGATTTAAAGGACAAGCAGGGATTTTCTAGGCAAAGAAG 123
          ||||| ||||||||||||||||||||||||||||||||||||||||||||
Sbjct 99   TACAGGGAAAACTGTCCAATGGATTTAAAGGACAAGCAGGGATTTTCTAGGCAAAGAAG 158

Query 124  CAGAATGGGCATCCCAGGAGTATGGTAAATCAAACTTATTGGGTGCTATGAATTTAAAG 183
          ||||| ||||||||||||||||||||||||||||||||||||||||||||
Sbjct 159  CAGAATGGGCATCCCAGGAGTATGGTAAATCAAACTTATTGGGTGCTATGAATTTAAAG 218

Query 184  CTAACTTTTATTTTATTGGCTTTTAGGTGGTGGCTAGAGTGATACCGTTTGGACC 243
          ||||| ||||||||||||||||||||||||||||||||||||||||||||
Sbjct 219  CTAACTTTTATTTTATTGGCTTTTAGGTGGTCTGGCTAGAGTGATACCGTTTGGACC 277
                                     CTGGCTAGAGTGATA-CG|

Query 244  CAAGCTTAACCTTTTCC 259
          ||||| |||||||
Sbjct 278  CAAGCTTAACCTTTTCC 293

```

Sequence alignment performed with Blast, Query: sequence corresponding to a fragment of exon 2 of *bmal1*, Subject: sequence corresponding to *bmal1* E1. In red: site of Crispr/Cas9 editing. Identity: 256/262 (98%)

Sequence ID: Query\_12599 Length: 320  
Range 1: 39 to 299

Score:449 bits(243), Expect:3e-131,  
Identities:256/262(98%), Gaps:2/262(0%), Strand: Plus/Plus

```

Query 7   ACAGTT-CATGGGTACTGAGAGGAGGGGTGCCTGGCCTGCCTGGAACACTGGGGAGGCT 65
          ||||| ||||||||||||||||||||||||||||||||||||||||||||
Sbjct 39   ACAGTTCATGGGTACTGAGAGGAGGGGTGCCTGGCCTGCCTGGAACACTGGGGAGGCT 98

Query 66   TACAGGGAAAACTGTCCAATGGATTTAAAGGACAAGCAGGGATTTTCTAGGCAAAGAAG 125
          ||||| ||||||||||||||||||||||||||||||||||||||||||||
Sbjct 99   TACAGGGAAAACTGTCCAATGGATTTAAAGGACAAGCAGGGATTTTCTAGGCAAAGAAG 158

Query 126  CAGAATGGGCATCCCAGGAGTATGGTAAATCAAACTTATTGGGTGCTATGAATTTAAAG 185
          ||||| ||||||||||||||||||||||||||||||||||||||||||||
Sbjct 159  CAGAATGGGCATCCCAGGAGTATGGTAAATCAAACTTATTGGGTGCTATGAATTTAAAG 218

Query 186  CTAACTTTTATTTTATTGGCTTTTAGGTGGTGGCTAGAGTGATACCGATTGGACC 245
          ||||| ||||||||||||||||||||||||||||||||||||||||||||
Sbjct 219  CTAACTTTTATTTTATTGGCTTTTAGGTGGTCTGGCTAGAGTGATACCGATTGGACC 277
                                     CTGGCTAGAGTGATA-CG|

Query 246  CAAGCTTATCTTTTGCATGTG 267
          ||||| ||||| | |||||
Sbjct 278  CAAGCTTAACCTTTCCAATGTG 299

```

**Figure S2.** Confirmation of genomic edition of Exon2 of *bmal1* by Crispr/Casp9.

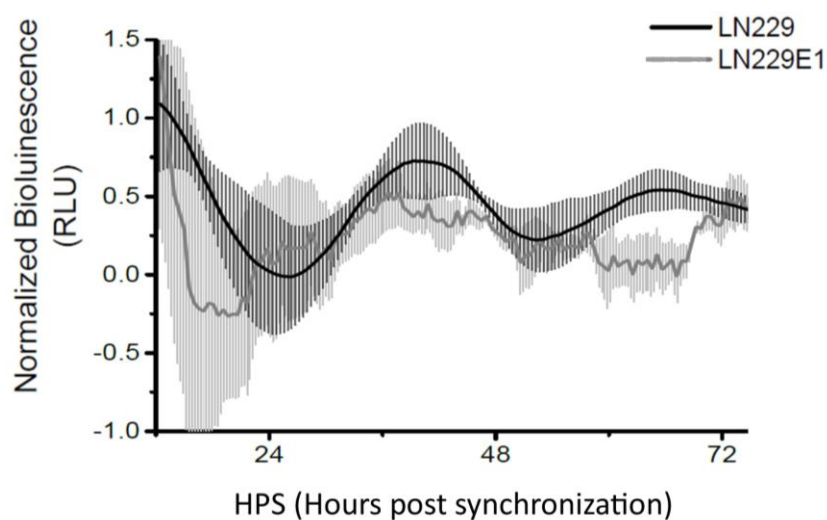

Figure S3. Circadian expression of Bmal1 is maintained for over 72 h.

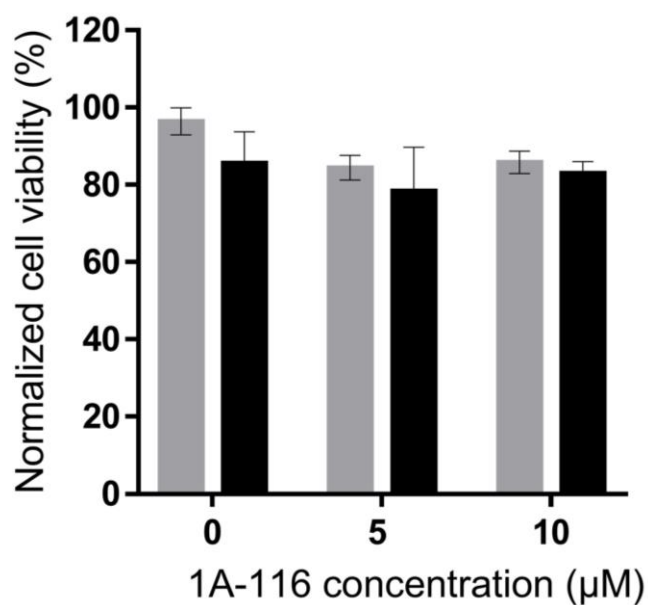

Figure S4. Cell viability.

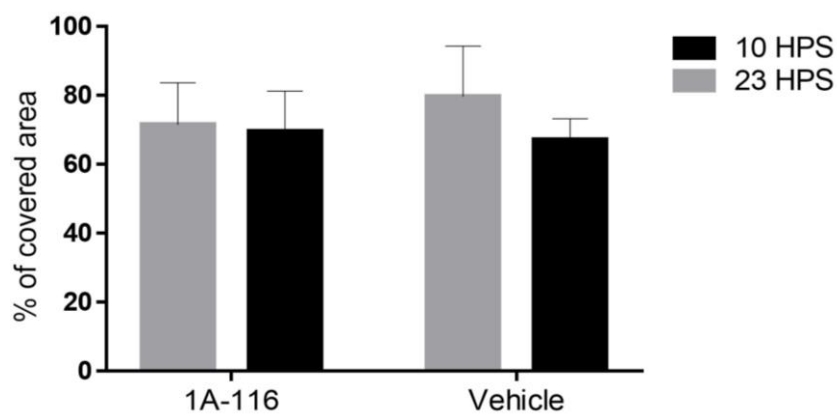

Figure S5. Number of cells outside of the migration area.
