# Supplementary material
Source: MDPI journal article supplement (https://www.mdpi.com/1999-4923/13/7/1091)
Supplement: s1 [file s1]

Archive with 1 entries (1 files):
- pharmaceutics-1279948-SI.pdf
